# Supplementary material for: Comparison of SF-36 and RAND-36 in Cardiovascular Diseases. A Reliability Study
Source: Preprints.org preprint supplement (doi:10.20944/preprints202409.0158.v1), 2024-09-03
Supplement: Supplementary file 1 [file supplementary]

**SUPPLEMENTARY MATERIAL 1**

Item-item and item-total correlation matrices for each of the eight dimensions in both scales.

| **Table.** Item-item and item-total correlation matrices for SF-36 “Physical Functioning” dimension. | | | | | | | | | | | | |
| --- | --- | --- | --- | --- | --- | --- | --- | --- | --- | --- | --- | --- |
|  | | **SF3a** | **SF3b** | **SF3c** | **SF3d** | **SF3e** | **SF3f** | **SF3g** | **SF3h** | **SF3i** | **SF3j** | **SF_PF** |
| **SF3a** | Pearson correlation | 1 | .491** | .393** | .482** | .287** | .301** | .288** | .242** | .095 | .049 | .,558** |
| Sig. (bilateral) |  | <.001 | <.001 | <.001 | <.001 | <.001 | <.001 | <.001 | **.054** | **.319** | <.001 |
| N | 411 | 410 | 409 | 410 | 411 | 411 | 411 | 409 | 409 | 411 | 406 |
| **SF3b** | Pearson correlation | .491** | 1 | .637** | .563** | .509** | .503** | .522** | .416** | .269** | .198** | .766** |
| Sig. (bilateral) | <.001 |  | <.001 | <.001 | <.001 | <.001 | <.001 | <.001 | <.001 | <.001 | <.001 |
| N | 410 | 411 | 409 | 410 | 411 | 411 | 411 | 409 | 409 | 411 | 406 |
| **SF3c** | Pearson correlation | .393** | .637** | 1 | .511** | .515** | .384** | .447** | .433** | .332** | .270** | .722** |
| Sig. (bilateral) | <.001 | <.001 |  | <.001 | <.001 | <.001 | <.001 | <.001 | <.001 | <.001 | <.001 |
| N | 409 | 409 | 411 | 409 | 411 | 410 | 411 | 408 | 408 | 411 | 406 |
| **SF3d** | Pearson correlation | .482** | .563** | .511** | 1 | .579** | .494** | .491** | .407** | .236** | .134** | .747** |
| Sig. (bilateral) | <.001 | <.001 | <.001 |  | <.001 | <.001 | <.001 | <.001 | <.001 | <.001 | <.001 |
| N | 410 | 410 | 409 | 411 | 411 | 411 | 411 | 410 | 410 | 411 | 406 |
| **SF3e** | Pearson correlation | .287** | .509** | .515** | .579** | 1 | .529** | .618** | .546** | .532** | .361** | .781** |
| Sig. (bilateral) | <.001 | <.001 | <.001 | <.001 |  | <.001 | <.001 | <.001 | <.001 | <.001 | <.001 |
| N | 411 | 411 | 411 | 411 | 413 | 412 | 413 | 410 | 410 | 413 | 406 |
| **SF3f** | Pearson correlation | .301** | .503** | .384** | .494** | .529** | 1 | .506** | .468** | .361** | .341** | .723** |
| Sig. (bilateral) | <.001 | <.001 | <.001 | <.001 | <.001 |  | <.001 | <.001 | <.001 | <.001 | <.001 |
| N | 411 | 411 | 410 | 411 | 412 | 412 | 412 | 410 | 410 | 412 | 406 |
| **SF3g** | Pearson correlation | .288** | .522** | .447** | .491** | .618** | .506** | 1 | .692** | .548** | .330** | .780** |
| Sig. (bilateral) | <.001 | <.001 | <.001 | <.001 | <.001 | <.001 |  | <.001 | <.001 | <.001 | <.001 |
| N | 411 | 411 | 411 | 411 | 413 | 412 | .413 | 410 | 410 | 413 | 406 |
| **SF3h** | Pearson correlation | .242** | .416** | .433** | .407** | .546** | .468** | .692** | 1 | .664** | .380** | .727** |
| Sig. (bilateral) | <.001 | <.001 | <.001 | <.001 | <.001 | <.001 | <.001 |  | <.001 | <.001 | <.001 |
| N | 409 | 409 | 408 | 410 | 410 | 410 | 410 | 410 | 410 | 410 | 406 |
| **SF3i** | Pearson correlation | .095 | .269** | .332** | .236** | .532** | .361** | .548** | .664** | 1 | .562** | .599** |
| Sig. (bilateral) | **,054** | <.001 | <.001 | <.001 | <.001 | <.001 | <.001 | <.001 |  | <.001 | <.001 |
| N | 409 | 409 | 408 | 410 | 410 | 410 | 410 | 410 | 410 | 410 | 406 |
| **SF3j** | Pearson correlation | .049 | .198** | .270** | .134** | .361** | .341** | .330** | .380** | .562** | 1 | .449** |
| Sig. (bilateral) | **,319** | <.001 | <.001 | ,007 | <.001 | <.001 | <.001 | <.001 | <.001 |  | <.001 |
| N | 411 | 411 | 411 | 411 | 413 | 412 | 413 | 410 | 410 | 413 | 406 |
| **SF_PF** | Pearson correlation | .558** | .766** | .722** | .747** | .781** | .723** | .780** | .727** | .599** | .449** | 1 |
| Sig. (bilateral) | <.001 | <.001 | <.001 | <.001 | <.001 | <.001 | <.001 | <.001 | <.001 | <.001 |  |
| N | 406 | 406 | 406 | 406 | 406 | 406 | 406 | 406 | 406 | 406 | 406 |
| **. The correlation is significant at the 0.01 level (bilateral). Bold: not significant correlations.  PF: Physical functioning. | | | | | | | | | | | | |

| **Table.** Item-item and item-total correlation matrices for SF-36 “Role Physical” dimension. | | | | | | |
| --- | --- | --- | --- | --- | --- | --- |
|  | | **Sf4a** | **SF4b** | **SF4c** | **SF4d** | **SF_RP** |
| **Sf4a** | Pearson correlation | 1 | .602** | .657** | .572** | .841** |
| Sig. (bilateral) |  | <.001 | <.001 | <.001 | <.001 |
| N | 405 | 403 | 403 | 405 | 401 |
| **SF4b** | Pearson correlation | .602** | 1 | .624** | .621** | .828** |
| Sig. (bilateral) | <.001 |  | <.001 | <.001 | <.001 |
| N | 403 | 404 | 402 | 404 | .401 |
| **SF4c** | Pearson correlation | .657** | .624** | 1 | .690** | ,879** |
| Sig. (bilateral) | <.001 | <.001 |  | <.001 | <.001 |
| N | 403 | 402 | 405 | 404 | 401 |
| **SF4d** | Pearson correlation | .572** | .621** | .690** | 1 | .847** |
| Sig. (bilateral) | <.001 | <.001 | <.001 |  | <.001 |
| N | 405 | 404 | 404 | 406 | 401 |
| **SF_RP** | Pearson correlation | .841** | .828** | .879** | .847** | 1 |
| Sig. (bilateral) | <.001 | <.001 | <.001 | <.001 |  |
| N | 401 | 401 | 401 | 401 | 401 |
| **. The correlation is significant at the 0.01 level (bilateral).  RP: Role physical. | | | | | | |

| **Table.** Item-item and item-total correlation matrices for SF-36 “Role Physical” dimension. | | | | |
| --- | --- | --- | --- | --- |
|  | | **SF7** | **SF8** | **SF_BP** |
| **SF7** | Pearson correlation | 1 | .753** | .935** |
| Sig. (bilateral) |  | <.001 | <.001 |
| N | 408 | 407 | 407 |
| **SF8** | Pearson correlation | .753** | 1 | .938** |
| Sig. (bilateral) | <.001 |  | <.001 |
| N | 407 | 408 | 407 |
| **SF_BP** | Pearson correlation | .935** | .938** | 1 |
| Sig. (bilateral) | <.001 | <.001 |  |
| N | 407 | 407 | 407 |
| **. The correlation is significant at the 0.01 level (bilateral).  BP: Bodily pain. | | | | |

| **Table.** Item-item and item-total correlation matrices for SF-36 “General Health” dimension. | | | | | | | |
| --- | --- | --- | --- | --- | --- | --- | --- |
|  | | **SF1** | **SF11a** | **SF11b** | **SF11c** | **SF11d** | **SF_GH** |
| **SF1** | Pearson correlation | 1 | .348** | .438** | .341** | .511** | .704** |
| Sig. (bilateral) |  | <.001 | <.001 | <.001 | <.001 | <.001 |
| N | 411 | 402 | 402 | 402 | 402 | 402 |
| **SF11a** | Pearson correlation | .348** | 1 | .339** | .350** | .294** | .664** |
| Sig. (bilateral) | <.001 |  | <.001 | <.001 | <.001 | <.001 |
| N | 402 | 404 | 404 | 404 | 404 | 402 |
| **SF11b** | Pearson correlation | .438** | .339** | 1 | .254** | .646** | .768** |
| Sig. (bilateral) | <.001 | <.001 |  | <.001 | <.001 | <.001 |
| N | 402 | 404 | 404 | 404 | 404 | 402 |
| **SF11c** | Pearson correlation | .341** | .350** | .254** | 1 | .368** | .637** |
| Sig. (bilateral) | <.001 | <.001 | <.001 |  | <.001 | <.001 |
| N | 402 | 404 | 404 | 404 | 404 | 402 |
| **SF11d** | Pearson correlation | .511** | .294** | .646** | .368** | 1 | .796** |
| Sig. (bilateral) | <.001 | <.001 | <.001 | <.001 |  | <.001 |
| N | 402 | 404 | 404 | 404 | 404 | 402 |
| **SF_GH** | Pearson correlation | .704** | .664** | .768** | .637** | .796** | 1 |
| Sig. (bilateral) | <.001 | <.001 | <.001 | <.001 | <.001 |  |
| N | 402 | 402 | 402 | 402 | 402 | 402 |
| **. The correlation is significant at the 0.01 level (bilateral).  GH: General health. | | | | | | | |

| **Table.** Item-item and item-total correlation matrices for SF-36 “Vitality” dimension. | | | | | | |
| --- | --- | --- | --- | --- | --- | --- |
|  | | **SF9a** | **SF9e** | **SF9g** | **SF9i** | **SF_VT** |
| **SF9a** | Pearson correlation | 1 | .706** | .402** | .445** | .812** |
| Sig. (bilateral) |  | <.001 | <.001 | <.001 | <.001 |
| N | 403 | 401 | 402 | 402 | 400 |
| **SF9e** | Pearson correlation | .706** | 1 | .425** | .506** | .837** |
| Sig. (bilateral) | <.001 |  | <.001 | <.001 | <.001 |
| N | 401 | 404 | 403 | 403 | 400 |
| **SF9g** | Pearson correlation | .402** | .425** | 1 | .693** | .765** |
| Sig. (bilateral) | <.001 | <.001 |  | <.001 | <.001 |
| N | 402 | 403 | 405 | 405 | 400 |
| **SF9i** | Pearson correlation | .445** | .506** | .693** | 1 | .801** |
| Sig. (bilateral) | <.001 | <.001 | <.001 |  | <.001 |
| N | 402 | 403 | 405 | 405 | 400 |
| **SF_VT** | Pearson correlation | .812** | .837** | .765** | .801** | 1 |
| Sig. (bilateral) | <.001 | <.001 | <.001 | <.001 |  |
| N | 400 | 400 | 400 | 400 | 400 |
| **. The correlation is significant at the 0.01 level (bilateral).  VT: Vitality. | | | | | | |

| **Table.** Item-item and item-total correlation matrices for SF-36 “Social Functioning” dimension | | | | |
| --- | --- | --- | --- | --- |
|  | | **SF6** | **SF10** | **SF_SF** |
| **SF6** | Pearson correlation | 1 | .515** | .902** |
| Sig. (bilateral) |  | <.001 | <.001 |
| N | 407 | 398 | 398 |
| **SF10** | Pearson correlation | .515** | 1 | .834** |
| Sig. (bilateral) | <.001 |  | <.001 |
| N | 398 | 400 | 398 |
| **SF_SF** | Pearson correlation | .902** | .834** | 1 |
| Sig. (bilateral) | <.001 | <.001 |  |
| N | 398 | 398 | 398 |
| **. The correlation is significant at the 0.01 level (bilateral).  SF: Social functioning. | | | | |

| **Table.** Item-item and item-total correlation matrices for SF-36 “Role emotional” dimension | | | | | |
| --- | --- | --- | --- | --- | --- |
|  | | **SF5a** | **SF5b** | **SF5c** | **SF_RE** |
| **SF5a** | Pearson correlation | 1 | .836** | .724** | .922** |
| Sig. (bilateral) |  | <.001 | <.001 | <.001 |
| N | 403 | 402 | 401 | 401 |
| **SF5b** | Pearson correlation | .836** | 1 | .791** | .947** |
| Sig. (bilateral) | <.001 |  | <.001 | <.001 |
| N | 402 | 403 | 401 | 401 |
| **SF5c** | Pearson correlation | .724** | .791** | 1 | .906** |
| Sig. (bilateral) | <.001 | <.001 |  | <.001 |
| N | 401 | 401 | 401 | 401 |
| **SF_RE** | Pearson correlation | .922** | .947** | .906** | 1 |
| Sig. (bilateral) | <.001 | <.001 | <.001 |  |
| N | 401 | 401 | 401 | 401 |
| **. The correlation is significant at the 0.01 level (bilateral).  RE: Role emotional. | | | | | |

| **Table.** Item-item and item-total correlation matrices for SF-36 “Mental Health” dimension | | | | | | | |
| --- | --- | --- | --- | --- | --- | --- | --- |
|  | | **SF9b** | **SF9c** | **SF9** | **SF9f** | **SF9h** | **SF_MH** |
| **SF9b** | Pearson correlation | 1 | .590** | .618** | .525** | .405** | .769** |
| Sig. (bilateral) |  | <.001 | <.001 | <.001 | <.001 | <.001 |
| N | 405 | 403 | 405 | 402 | 403 | 399 |
| **SF9c** | Pearson correlation | .590** | 1 | .580** | .754** | .559** | .856** |
| Sig. (bilateral) | <.001 |  | <.001 | <.001 | <.001 | <.001 |
| N | 403 | 403 | 403 | 400 | 402 | 399 |
| **SF9d** | Pearson correlation | .618** | .580** | 1 | .541** | .610** | .823** |
| Sig. (bilateral) | <.001 | <.001 |  | <.001 | <.001 | <.001 |
| N | 405 | 403 | 406 | 402 | 404 | 399 |
| **SF9f** | Pearson correlation | .525** | .754** | .541** | 1 | .595** | .839** |
| Sig. (bilateral) | <.001 | <.001 | <.001 |  | <.001 | <.001 |
| N | 402 | 400 | 402 | 402 | 400 | 399 |
| **SF9h** | Pearson correlation | .405** | .559** | .610** | .595** | 1 | .791** |
| Sig. (bilateral) | <.001 | <.001 | <.001 | <.001 |  | <.001 |
| N | 403 | 402 | 404 | 400 | 404 | 399 |
| **SF_MH** | Pearson correlation | .769** | .856** | .823** | .839** | .791** | 1 |
| Sig. (bilateral) | <.001 | <.001 | <.001 | <.001 | <.001 |  |
| N | 399 | 399 | 399 | 399 | 399 | 399 |
| **. The correlation is significant at the 0.01 level (bilateral).  MH: Mental health. | | | | | | | |

| **Table.** Item-item and item-total correlation matrices for RAND-36 “Physical functioning” dimension. | | | | | | | | | | | | |
| --- | --- | --- | --- | --- | --- | --- | --- | --- | --- | --- | --- | --- |
|  | | **RAND3a** | **RAND3b** | **RAND3c** | **RAND3d** | **RAND3e** | **RAND3f** | **RAND3** | **RAND3h** | **RAND3i** | **RAND3** | **RAND_PF** |
| **RAND3a** | Pearson correlation | 1 | .500** | .408** | .481** | .283** | .302** | .278** | .236** | .088 | .041 | .557** |
| Sig. (bilateral) |  | <.001 | <.001 | <.001 | <.001 | <.001 | <.001 | <.001 | **.078** | **.405** | <.001 |
| N | 407 | 403 | 400 | 402 | 403 | 406 | 403 | 404 | 404 | 406 | 387 |
| **RAND3b** | Pearson correlation | .500** | 1 | .644** | .563** | .511** | .504** | .521** | .415** | .269** | .190** | .780** |
| Sig. (bilateral) | <.001 |  | <.001 | <.001 | <.001 | <.001 | <.001 | <.001 | <.001 | <.001 | <.001 |
| N | 403 | 408 | 401 | 403 | 403 | 407 | 404 | 405 | 405 | 407 | 387 |
| **RAND3c** | Pearson correlation | .408** | .644** | 1 | .510** | .512** | .380** | .442** | .427** | .322** | .269** | .727** |
| Sig. (bilateral) | <.001 | <.001 |  | <.001 | <.001 | <.001 | <.001 | <.001 | <.001 | <.001 | <.001 |
| N | 400 | 401 | 406 | 401 | 404 | 404 | 403 | 402 | 402 | 405 | 387 |
| **RAND3d** | Pearson correlation | .481** | .563** | .510** | 1 | .586** | .499** | .492** | .414** | .239** | .134** | .758** |
| Sig. (bilateral) | <.001 | <.001 | <.001 |  | <.001 | <.001 | <.001 | <.001 | <.001 | <.001 | <.001 |
| N | 402 | 403 | 401 | 407 | 403 | 406 | 405 | 405 | 405 | 407 | 387 |
| **RAND3e** | Pearson correlation | .283** | .511** | .512** | .586** | 1 | .534** | .622** | .545** | .535** | .365** | .787** |
| Sig. (bilateral) | <.001 | <.001 | <.001 | <.001 |  | <.001 | <.001 | <.001 | <.001 | <.001 | <.001 |
| N | 403 | 403 | 404 | 403 | 408 | 406 | 405 | 404 | 404 | 407 | 387 |
| **RAND3f** | Pearson correlation | .302** | .504** | .380** | .499** | .534** | 1 | .502** | .467** | .360** | .337** | .723** |
| Sig. (bilateral) | <.001 | <.001 | <.001 | <.001 | <.001 |  | <.001 | <.001 | <.001 | <.001 | <.001 |
| N | 406 | 407 | 404 | 406 | 406 | 411 | 407 | 408 | 408 | 410 | 387 |
| **RAND3g** | Pearson correlation | .278** | .521** | .442** | .492** | .622** | .502** | 1 | .692** | .549** | .323** | .782** |
| Sig. (bilateral) | <.001 | <.001 | <.001 | <.001 | <.001 | <.001 |  | <.001 | <.001 | <.001 | <.001 |
| N | 403 | 404 | 403 | 405 | 405 | 407 | 409 | 406 | 406 | 409 | 387 |
| **RAND3h** | Pearson correlation | .236** | .415** | .427** | .414** | .545** | .467** | .692** | 1 | .662** | .364** | .721** |
| Sig. (bilateral) | <.001 | <.001 | <.001 | <.001 | <.001 | <.001 | <.001 |  | <.001 | <.001 | <.001 |
| N | 404 | 405 | 402 | 405 | 404 | 408 | 406 | 409 | 409 | 408 | 387 |
| **RAND3i** | Pearson correlation | .088 | .269** | .322** | .239** | .535** | .360** | .549** | .662** | 1 | .550** | .596** |
| Sig. (bilateral) | **.078** | <.001 | <.001 | <.001 | <.001 | <.001 | <.001 | <.001 |  | <.001 | <.001 |
| N | 404 | 405 | 402 | 405 | 404 | 408 | 406 | 409 | 409 | 408 | 387 |
| **RAND3j** | Pearson correlation | .041 | .190** | .269** | .134** | .365** | .337** | .323** | .364** | .550** | 1 | .450** |
| Sig. (bilateral) | **.405** | <.001 | <.001 | .007 | <.001 | <.001 | <.001 | <.001 | <.001 |  | <.001 |
| N | 406 | 407 | 405 | 407 | 407 | 410 | 409 | 408 | 408 | 412 | 387 |
| **RAND_PF** | Pearson correlation | .557** | .780** | .727** | .758** | .787** | .723** | .782** | .721** | .596** | .450** | 1 |
| Sig. (bilateral) | <.001 | <.001 | <.001 | <.001 | <.001 | <.001 | <.001 | <.001 | <.001 | <.001 |  |
| N | 387 | 387 | 387 | 387 | 387 | 387 | 387 | 387 | 387 | 387 | 387 |
| **. The correlation is significant at the 0.01 level (bilateral). Bold: not significant correlations.  PF: Physical functioning. | | | | | | | | | | | | |

| **Table.** Item-item and item-total correlation matrices for RAND-36 “Role limitations due to physical heath” dimension. | | | | | | |
| --- | --- | --- | --- | --- | --- | --- |
|  | | **RAND4a** | **RAND4b** | **RAND4c** | **RAND4d** | **RAND_RP** |
| **RAND4a** | Pearson correlation | 1 | .602** | .662** | .579** | .843** |
| Sig. (bilateral) |  | <.001 | <.001 | <.001 | <.001 |
| N | 402 | 397 | 400 | 402 | 395 |
| **RAND4b** | Pearson correlation | .602** | 1 | .628** | .628** | .831** |
| Sig. (bilateral) | <.001 |  | <.001 | <.001 | <.001 |
| N | 397 | 400 | 398 | 400 | 395 |
| **RAND4c** | Pearson correlation | .662** | .628** | 1 | .689** | .880** |
| Sig. (bilateral) | <.001 | <.001 |  | <.001 | <.001 |
| N | 400 | 398 | 404 | 403 | 395 |
| **RAND4d** | Pearson correlation | .579** | .628** | .689** | 1 | .848** |
| Sig. (bilateral) | <.001 | <.001 | <.001 |  | <.001 |
| N | 402 | 400 | 403 | 405 | 395 |
| **RAND_RP** | Pearson correlation | .843** | .831** | .880** | .848** | 1 |
| Sig. (bilateral) | <.001 | <.001 | <.001 | <.001 |  |
| N | 395 | 395 | 395 | 395 | 395 |
| **. The correlation is significant at the 0.01 level (bilateral).  RP: Role limitations due to physical heath. | | | | | | |

| **Table.** Item-item and item-total correlation matrices for RAND-36 “Pain” dimension | | | | |
| --- | --- | --- | --- | --- |
|  | | **RAND7** | **RAND8** | **RAND_BP** |
| **RAND7** | Pearson correlation | 1 | .690** | .914** |
| Sig. (bilateral) |  | <.001 | <.001 |
| N | 408 | 406 | 406 |
| **RAND8** | Pearson correlation | .690** | 1 | .924** |
| Sig. (bilateral) | <.001 |  | <.001 |
| N | 406 | 407 | 406 |
| **RAND_BP** | Pearson correlation | .914** | .924** | 1 |
| Sig. (bilateral) | <.001 | <.001 |  |
| N | 406 | 406 | 406 |
| **. The correlation is significant at the 0.01 level (bilateral).  BP: Pain | | | | |

| **Table.** Item-item and item-total correlation matrices for RAND-36 “General health” dimension | | | | | | | |
| --- | --- | --- | --- | --- | --- | --- | --- |
|  | | **RAND1** | **RAND11a** | **RAND11b** | **RAND11c** | **RAND11d** | **RAND_GH** |
| **RAND1** | Pearson correlation | 1 | .331** | .436** | .341** | .509** | .674** |
| Sig. (bilateral) |  | <.001 | <.001 | <.001 | <.001 | <.001 |
| N | 410 | 401 | 401 | 401 | 401 | 401 |
| **RAND11a** | Pearson correlation | .331** | 1 | .339** | .350** | .294** | .667** |
| Sig. (bilateral) | <.001 |  | <.001 | <.001 | <.001 | <.001 |
| N | 401 | 404 | 404 | 404 | 404 | 401 |
| **RAND11b** | Pearson correlation | .436** | .339** | 1 | .254** | .646** | .773** |
| Sig. (bilateral) | <.001 | <.001 |  | <.001 | <.001 | <.001 |
| N | 401 | 404 | 04 | 404 | 404 | 401 |
| **RAND11c** | Pearson correlation | .341** | .350** | .254** | 1 | .368** | .643** |
| Sig. (bilateral) | <.001 | <.001 | <.001 |  | <.001 | <.001 |
| N | 401 | 404 | 404 | 404 | 404 | 401 |
| **RAND11d** | Pearson correlation | .509** | .294** | .646** | .368** | 1 | .798** |
| Sig. (bilateral) | <.001 | <.001 | <.001 | <.001 |  | <.001 |
| N | 401 | 404 | 404 | 404 | 404 | 401 |
| **RAND_GH** | Pearson correlation | .674** | .667** | .773** | .643** | .798** | 1 |
| Sig. (bilateral) | <.001 | <.001 | <.001 | <.001 | <.001 |  |
| N | 401 | 401 | 401 | 401 | 401 | 401 |
| **. The correlation is significant at the 0.01 level (bilateral).  GH: General health. | | | | | | | |

| **Table.** Item-item and item-total correlation matrices for RAND-36 “Energy/fatigue” dimension | | | | | | |
| --- | --- | --- | --- | --- | --- | --- |
|  | | **RAND9a** | **RAND9e** | **RAND9g** | **RAND9i** | **RAND_VT** |
| **RAND9a** | Pearson correlation | 1 | .706** | .402** | .445** | .812** |
| Sig. (bilateral) |  | <.001 | <.001 | <.001 | <.001 |
| N | 403 | 401 | 402 | 402 | 400 |
| **RAND9e** | Pearson correlation | .706** | 1 | .425** | .506** | .837** |
| Sig. (bilateral) | <.001 |  | <.001 | <.001 | <.001 |
| N | 401 | 404 | 403 | 403 | 400 |
| **RAND9g** | Pearson correlation | .402** | .425** | 1 | .693** | .765** |
| Sig. (bilateral) | <.001 | <.001 |  | <.001 | <.001 |
| N | 402 | 403 | 405 | 405 | 400 |
| **RAND9i** | Pearson correlation | .445** | .506** | .693** | 1 | .801** |
| Sig. (bilateral) | <.001 | <.001 | <.001 |  | <.001 |
| N | 402 | 403 | 405 | 405 | 400 |
| **RAND_VT** | Pearson correlation | .812** | .837** | .765** | .801** | 1 |
| Sig. (bilateral) | <.001 | <.001 | <.001 | <.001 |  |
| N | 400 | 400 | 400 | 400 | 400 |
| **. The correlation is significant at the 0.01 level (bilateral).  VT: Energy/fatigue. | | | | | | |

| **Table.** Item-item and item-total correlation matrices for RAND-36 “Social functioning” dimension | | | | |
| --- | --- | --- | --- | --- |
|  | | **RAND6** | **RAND10** | **RAND_SF** |
| **RAND6** | Pearson correlation | 1 | .630** | .904** |
| Sig. (bilateral) |  | <.001 | <.001 |
| N | 407 | 398 | 398 |
| **RAND10** | Pearson correlation | .630** | 1 | .902** |
| Sig. (bilateral) | <.001 |  | <.001 |
| N | 398 | 400 | 398 |
| **RAND_SF** | Pearson correlation | .904** | .902** | 1 |
| Sig. (bilateral) | <.001 | <.001 |  |
| N | 398 | 398 | 398 |
| **. The correlation is significant at the 0.01 level (bilateral).  SF: Social functioning. | | | | |

| **Table.** Item-item and item-total correlation matrices for RAND-36 “Role limitations due to emotional problems” dimension | | | | | |
| --- | --- | --- | --- | --- | --- |
|  | | **RAND5a** | **RAND5b** | **RAND5c** | **RAND_RE** |
| **RAND5a** | Pearson correlation | 1 | .836** | .724** | .922** |
| Sig. (bilateral) |  | <.001 | <.001 | <.001 |
| N | 403 | 402 | 401 | 401 |
| **RAND5b** | Pearson correlation | .836** | 1 | .791** | .947** |
| Sig. (bilateral) | <.001 |  | <.001 | <.001 |
| N | 402 | 403 | 401 | 401 |
| **RAND5c** | Pearson correlation | .724** | .791** | 1 | .906** |
| Sig. (bilateral) | <.001 | <.001 |  | <.001 |
| N | 401 | 401 | 401 | 401 |
| **RAND_RE** | Pearson correlation | .922** | .947** | .906** | 1 |
| Sig. (bilateral) | <.001 | <.001 | <.001 |  |
| N | 401 | 401 | 401 | 401 |
| **. The correlation is significant at the 0.01 level (bilateral).  RE: Role limitations due to emotional problems. | | | | | |

| **Table.** Item-item and item-total correlation matrices for RAND-36 “Emotional wellbeing” dimension. | | | | | | | |
| --- | --- | --- | --- | --- | --- | --- | --- |
|  | | **RAND9b** | **RAND9c** | **RAND9d** | **RAND9f** | **RAND9h** | **RAND_MH** |
| **RAND9b** | Pearson correlation | 1 | .590** | .618** | .525** | .405** | .769** |
| Sig. (bilateral) |  | <.001 | <.001 | <.001 | <.001 | <.001 |
| N | 405 | 403 | 405 | 402 | 403 | 399 |
| **RAND9c** | Pearson correlation | .590** | 1 | .580** | .754** | .559** | .856** |
| Sig. (bilateral) | <.001 |  | <.001 | <.001 | <.001 | <.001 |
| N | 403 | 403 | 403 | 400 | 402 | 399 |
| **RAND9d** | Pearson correlation | .618** | .580** | 1 | .541** | .610** | .823** |
| Sig. (bilateral) | <.001 | <.001 |  | <.001 | <.001 | <.001 |
| N | 405 | 403 | 406 | 402 | 404 | 399 |
| **RAND9f** | Pearson correlation | .525** | .754** | .541** | 1 | .595** | .839** |
| Sig. (bilateral) | <.001 | <.001 | <.001 |  | <.001 | <.001 |
| N | 402 | 400 | 402 | 402 | 400 | 399 |
| **RAND9h** | Pearson correlation | .405** | .559** | .610** | .595** | 1 | .791** |
| Sig. (bilateral) | <.001 | <.001 | <.001 | <.001 |  | <.001 |
| N | 403 | 402 | 404 | 400 | 404 | 399 |
| **RAND_MH** | Pearson correlation | .769** | .856** | .823** | .839** | .791** | 1 |
| Sig. (bilateral) | <.001 | <.001 | <.001 | <.001 | <.001 |  |
| N | 399 | 399 | 399 | 399 | 399 | 399 |
| **. The correlation is significant at the 0.01 level (bilateral).  MH: Emotional wellbeing. | | | | | | | |
